# Supplementary material for: Simultaneous quantitative LC-MS/MS analysis of 13 apolipoproteins and lipoprotein (a) in human plasma
Source: Royal Society of Chemistry journal article supplement (doi:10.1039/d4an00221k), 2024-01-01

## Supplementary Materials

### Simultaneous quantitative LC-MS/MS analysis of 13 apolipoproteins and lipoprotein (a) in human plasma

Yuxuan Zhang et al

#### Supplemental Table

**Supplemental Table S1.** The MRM transitions, decluttering potential and collision energy of each peptide and its internal standards.

**Supplemental Table S2.** Effects of different trypsin: plasma protein ratio on measured apolipoproteins and Lp(a).

**Supplementary Table S3.** The matrix factor of all measured peptide segments of apolipoproteins and Lp(a) in mice plasma.

**Supplemental Table S4.** Demographical characteristics and distribution of apolipoproteins and Lp(a) concentration in the human plasma from 45 volunteers.

#### Supplemental Figures

**Supplementary Figure S1.** The total (A) and dynamic multiple reaction monitoring (B) chromatograms of the internal standards of each peptide in a standard solution mixture.

**Supplementary Figure S2.** Effects of solid phase extraction on the dynamic multiple reaction monitoring (MRM) chromatograms containing mixed peptide standards. (A) human plasma without SPE extraction (B) human plasma with HLB SPE extraction.

**Supplementary Figure S3.** Effects of different reducing agents on the total ion chromatograms containing mixed peptide standards and representative internal standards. (A) Extraction by adding reducing agent DTT. (B) Extraction by adding reducing agent TCEP.

**Supplemental Figure S4.** Effects of different concentrations of SDC on sample preparation. (A) 0.5% SDC, (B) 1% SDC, (C) 2% SDC.

**Supplemental Figure S5.** The dynamic multiple reaction monitoring (MRM) chromatograms of different matrix solutions containing representative internal standards. (A) bovine serum albumin, (B) mice plasma.



**Supplemental Table S1.** The MRM transitions, collision energy, decluttering potential, and cell exit potential of each peptide and its internal standards.

| Peptide            | Protein name | Peptide name | Protein MW (Kda) | Peptide MW | Precursor ion | Product ion      | DP             | CE           | SIL      |
|--------------------|--------------|--------------|------------------|------------|---------------|------------------|----------------|--------------|----------|
| <u>VQPYLDDFQK</u>  | apoA1        | apoA1-VQPY   | 30.8             | 1252.3718  | 627.1         | 1025.7<br>1008.4 | 44<br>23       | 23<br>24     | apoA1-IS |
| VQPYLDDFQK*        | apoA1        | apoA1-IS     | /                | 1260.3859  | 631.1         | 1033.7<br>1016.4 | 46<br>40       | 21.3<br>25.6 | /        |
| VSFLSALEEYTK       | apoA1        | apoA1-VSFL   | 30.8             | 1386.5453  | 694.1         | 940.3<br>853.4   | 72<br>106      | 33<br>30     | apoA1-IS |
| <u>SPELQAEAK</u>   | apoA2        | apoA2-SPEL   | 11.2             | 972.0506   | 487.1         | 442.8<br>659.4   | 87.3<br>44     | 24<br>26     | apoA2-IS |
| SPELQAEAK*         | apoA2        | apoA2-IS     | /                | 980.0648   | 491.1         | 450.8<br>667.4   | 87.3<br>44     | 24<br>26     | /        |
| EQLTPLIK           | apoA2        | apoA2-EQLT   | 11.2             | 941.1227   | 471.5         | 684.4<br>571.5   | 51.4<br>128.5  | 20<br>28     | apoA2-IS |
| VQELQEQLR          | apoA5        | apoA5-VQEL   | 41.2             | 1142.2629  | 571.9         | 673.6<br>915.4   | 38<br>40       | 24<br>29.6   | apoA5-IS |
| VQELQEQLR*         | apoA5        | apoA5-IS     | /                | 1152.2711  | 576.9         | 683.6<br>925.4   | 40<br>45       | 30<br>28     | /        |
| FPEVDLTK           | apoB         | apoB-FPEV    | 515.6            | 1047.2016  | 524.5         | 450.5<br>803.6   | 149.7<br>139.4 | 23<br>30     | apoB-IS1 |
| FPEVDLTK*          | apoB-IS      | apoB-IS1     | /                | 1055.2157  | 528.5         | 811.6<br>908.6   | 139.4<br>60    | 30<br>30     | /        |
| <u>TEVIPPLIENR</u> | apoB         | apoB-TEVI    | 515.6            | 1280.4697  | 641.1         | 838.7<br>741.2   | 67.4<br>56     | 25.2<br>33   | apoB-IS2 |
| TEVIPPLIENR*       | apoB-IS      | apoB-IS2     | /                | 1290.4780  | 646.1         | 848.7<br>751.2   | 65.2<br>27     | 29<br>32     | /        |
| TGISPLALIK         | apoB         | apoB-TGIS    | 515.6            | 1012.2437  | 507.1         | 741.7<br>654.6   | 32<br>25       | 22<br>23     | apoB-IS  |

|                             |         |            |      |           |       |       |       |      |          |
|-----------------------------|---------|------------|------|-----------|-------|-------|-------|------|----------|
| <u>EFGNTLEDK</u>            | apoC1   | apoC1-EFGN | 9.3  | 1052.0922 | 527.1 | 391.3 | 41    | 22   | apoC1-IS |
|                             |         |            |      |           |       | 776.4 | 31    | 24   |          |
| EFGNTLEDK*                  | apoC1   | apoC1-IS   | /    | 1060.1064 | 531.1 | 399.3 | 41    | 24   | /        |
|                             |         |            |      |           |       | 784.4 | 44    | 22   |          |
| LGPLVEQGR                   | apoC1   | apoC1-LGPL | 9.3  | 968.1083  | 527   | 391.3 | 41    | 22   | apoC1-IS |
|                             |         |            |      |           |       | 776.4 | 31    | 24   |          |
| <u>TYLPAVDEK</u>            | apoC2   | apoC2-TYLP | 11.3 | 1035.1478 | 518.3 | 658.3 | 60    | 24.2 | apoC2-IS |
|                             |         |            |      |           |       | 771.6 | 68    | 20.8 |          |
| TYLPAVDEK*                  | apoC2   | apoC2-IS   | /    | 1043.1619 | 522.3 | 666.3 | 128   | 25   | /        |
|                             |         |            |      |           |       | 779.6 | 86    | 23   |          |
| TAAQNLYEK                   | apoC2   | apoC2-TAAQ | 11.3 | 1037.1240 | 519.5 | 865.7 | 128   | 25   | apoC2-IS |
|                             |         |            |      |           |       | 666.5 | 86    | 25   |          |
| GWVTDGFSSLK                 | apoC3   | apoC3      | 10.9 | 1196.3085 | 598.9 | 854.6 | 60    | 27.1 | apoC3-IS |
|                             |         |            |      |           |       | 343.2 | 40    | 23.6 |          |
| GWVTDGFSSLK*                | apoC3   | apoC3-IS   | /    | 1204.3226 | 598.9 | 854.6 | 60    | 27.1 | /        |
|                             |         |            |      |           |       | 343.2 | 40    | 23.6 |          |
| NILTSNNIDVK                 | apoD    | apoD       | 21.3 | 1230.3680 | 616   | 890.6 | 131   | 32   | apoD-IS  |
|                             |         |            |      |           |       | 789.4 | 146   | 31   |          |
| NILTSNNIDVK*                | apoD    | apoD-IS    | /    | 1238.3821 | 620   | 898.6 | 144   | 28   | /        |
|                             |         |            |      |           |       | 797.4 | 102   | 35   |          |
| <u>LGPLVEQGR</u>            | apoE    | apoE-LGPL  | 36.2 | 968.1083  | 484.8 | 588.5 | 60    | 30.6 | apoE-IS  |
|                             |         |            |      |           |       | 701.6 | 50    | 31.1 |          |
| LGPLVEQGR*                  | apoE-IS | apoE-IS    | /    | 978.1165  | 489.8 | 598.5 | 60    | 30.8 | /        |
|                             |         |            |      |           |       | 711.6 | 50    | 31.7 |          |
| AATVGLSLAGQPLQER            | apoE    | apoE-AATV  | 36.2 | 1497.6524 | 749.6 | 625.5 | 100   | 39   | apoE-IS  |
|                             |         |            |      |           |       | 642.3 | 139.1 | 36.1 |          |
| ATVVYQGER                   | apoH    | apoH       | 38.3 | 1022.1126 | 512.0 | 652.4 | 66    | 22   | apoH-IS  |
|                             |         |            |      |           |       | 751.4 | 75    | 15   |          |
| ATVVYQGER*                  | apoH    | apoH-IS    | /    | 1032.1209 | 517.0 | 662.4 | 52    | 33   | /        |
|                             |         |            |      |           |       | 761.4 | 67    | 15   |          |
| VTTVASHTSDSDVPS<br>GVTEVVVK | apoJ    | apoJ       | 51.1 | 2314.5021 | 772.4 | 507.9 | 50    | 30.2 | apoE-IS  |
|                             |         |            |      |           |       | 650.9 | 45    | 28.8 |          |

|                  |                   |               |      |           |       |        |     |      |          |
|------------------|-------------------|---------------|------|-----------|-------|--------|-----|------|----------|
| ALDNLAR          | apoL1             | apoL1         | 56   | 771.8620  | 386.9 | 473.4  | 53  | 27   | apoL1-IS |
|                  |                   |               |      |           |       | 588.5  | 60  | 30.6 |          |
| ALDNLAR*         | apoL1             | apoL1-IS      | /    | 781.8703  | 391.9 | 483.4  | 51  | 23.8 | /        |
|                  |                   |               |      |           |       | 598.5  | 93  | 17   |          |
| FLLYNR           | apoM              | apoM          | 21.2 | 824.9660  | 413.6 | 565.3  | 125 | 20   | apoM-IS  |
|                  |                   |               |      |           |       | 452.3  | 100 | 20   |          |
| FLLYNR*          | apoM              | apoM-IS       | 21.2 | 834.9743  | 418.6 | 575.3  | 119 | 32   | /        |
|                  |                   |               |      |           |       | 462.3  | 102 | 32   |          |
| TPENYPNAGLTR     | Lp(a)             | Lp(a)-TPEN    | /    | 1332.4184 | 666.9 | 1005.3 | 60  | 37.1 | Lp(a)-   |
|                  |                   |               |      |           |       | 728.2  | 80  | 37.4 | TTPEN-IS |
| TPENYPNAGLTR*    | Lp(a)-TPEN-<br>IS | Lp(a)-TPEN-IS | /    | 1342.4267 | 672.4 | 738.4  | 25  | 39.2 | /        |
|                  |                   |               |      |           |       | 1015.3 | 65  | 28.2 |          |
| <u>GISSTVTGR</u> | Lp(a)             | Lp(a)-GISS    | /    | 978.0585  | 489.9 | 808.3  | 30  | 21.8 | Lp(a)-   |
|                  |                   |               |      |           |       | 533.3  | 40  | 25.2 | GISS-IS  |
| GISSTVTGR*       | Lp(a)-GISS-<br>IS | Lp(a)-GISS-IS | /    | 988.0668  | 495.3 | 543.2  | 30  | 22.5 | /        |
|                  |                   |               |      |           |       | 818.2  | 31  | 22.8 |          |

Note: \* are the internal standards peptides and the bottom line is the quantitative peptides.

**Supplemental Table S2** Effects of different trypsin: plasma protein ratio on measured apolipoproteins and Lp(a).

| □<br>Peptide | Relative deviation (%) |               |                 |
|--------------|------------------------|---------------|-----------------|
|              | 1 µg<br>(1:14)         | 2 µg<br>(1:7) | 4 µg<br>(1:3.5) |
| <i>ApoA1</i> | 2.43                   | 4.96          | -6.46           |
| <i>ApoA2</i> | 3.05                   | 5.22          | -14.04          |
| <i>ApoA5</i> | 13.43                  | 12.62         | 11.5            |
| <i>ApoB</i>  | 5.19                   | 10.3          | 10.82           |
| <i>ApoC1</i> | 0.98                   | 1.6           | -6.26           |
| <i>ApoC2</i> | 2.01                   | -0.78         | -0.48           |
| <i>ApoC3</i> | 3.63                   | 4.62          | -12.3           |
| <i>ApoD</i>  | 5.25                   | 4.67          | -0.41           |
| <i>ApoE</i>  | 1.24                   | -1.43         | -0.85           |
| <i>ApoH</i>  | 1.01                   | -2.85         | -0.39           |
| <i>ApoJ</i>  | 12.07                  | -3.16         | -2.66           |
| <i>ApoL1</i> | 2.09                   | -11.55        | -9.2            |
| <i>ApoM</i>  | 2.36                   | -6.47         | -4.81           |
| <i>Lp(a)</i> | 5.25                   | -7.51         | 3.57            |

**Supplementary Table S3.** The matrix factor of all measured peptide segments of apolipoproteins and Lp(a) in mice plasma.

| Peptide      | LQC         |        | MQC         |        | HQC         |        |
|--------------|-------------|--------|-------------|--------|-------------|--------|
|              | Con (ng/ml) | % MF   | Con (ng/ml) | % MF   | Con (ng/ml) | % MF   |
| <i>ApoA1</i> | 12500       | 99.10  | 25000       | 104.65 | 100000      | 101.03 |
| <i>ApoA2</i> | 6250        | 78.02  | 12500       | 87.56  | 50000       | 79.19  |
| <i>ApoA5</i> | 1.25        | 303.74 | 2.5         | 69.91  | 10          | 52.57  |
| <i>ApoB</i>  | 312.5       | 99.22  | 625         | 94.19  | 2500        | 95.88  |
| <i>ApoC1</i> | 625         | 96.36  | 1250        | 102.41 | 5000        | 97.29  |
| <i>ApoC2</i> | 781.25      | 95.12  | 1562.5      | 96.86  | 6250        | 90.33  |
| <i>ApoC3</i> | 1562.5      | 97.00  | 3125        | 99.40  | 12500       | 95.74  |
| <i>ApoD</i>  | 1562.5      | 96.23  | 3125        | 107.10 | 12500       | 100.32 |
| <i>ApoE</i>  | 156.25      | 89.51  | 312.5       | 99.08  | 1250        | 93.16  |
| <i>ApoH</i>  | 625         | 99.69  | 1250        | 98.84  | 5000        | 93.94  |
| <i>ApoJ</i>  | 1562.5      | 95.15  | 3125        | 70.43  | 12500       | 65.18  |
| <i>ApoL1</i> | 312.5       | 86.86  | 625         | 72.11  | 2500        | 73.21  |
| <i>ApoM</i>  | 156.25      | 83.66  | 312.5       | 79.92  | 1250        | 73.11  |
| <i>Lp(a)</i> | 31.25       | 88.43  | 62.5        | 113.24 | 250         | 95.62  |

**Supplemental Table S4.** Demographical characteristics and distribution of apolipoproteins and Lp(a) concentration in the human plasma from 45 volunteers.

| <b>Volunteers (N=45)</b>      |              |
|-------------------------------|--------------|
| Demographical characteristics |              |
| Age                           | 57.6±14.7    |
| Sex (Male, %)                 | 23 (51.1%)   |
| ALT (U/L)                     | 32.6±35.5    |
| AST (U/L)                     | 29.2±17.1    |
| TC (mmol/L)                   | 4.3±1.4      |
| TG (mmol/L)                   | 1.9±1.6      |
| HDL (mmol/L)                  | 1.1±0.2      |
| LDL (mmol/L)                  | 2.5±1.1      |
| Glucose (mmol/L)              | 6.4±2.2      |
| Protein concentration         |              |
| ApoA1 (g/L)                   | 0.99±0.22    |
| ApoA2 (g/L)                   | 0.19±0.05    |
| ApoA5 (mg/L)                  | 0.24±0.16    |
| ApoB (g/L)                    | 0.62±0.23    |
| ApoC1 (mg/L)                  | 30.31±12.38  |
| ApoC2 (mg/L)                  | 33.89±29.63  |
| ApoC3 (mg/L)                  | 52.48±43.7   |
| ApoD (mg/L)                   | 16.62±6.23   |
| ApoE (mg/L)                   | 55.02±52.29  |
| ApoH (mg/L)                   | 89.32±17.43  |
| ApoJ (mg/L)                   | 204.09±50.91 |
| ApoL1 (mg/L)                  | 30.28±10.15  |
| ApoM (mg/L)                   | 10.26±2.99   |
| Lp(a) (nmol/L)                | 58.04±68.24  |

Note: All values are reported in the form of mean ± standard deviation.



**Supplementary Figure S1.** The total (A) and dynamic multiple reaction monitoring (B) chromatograms of the internal standards of each peptide in a standard solution mixture.

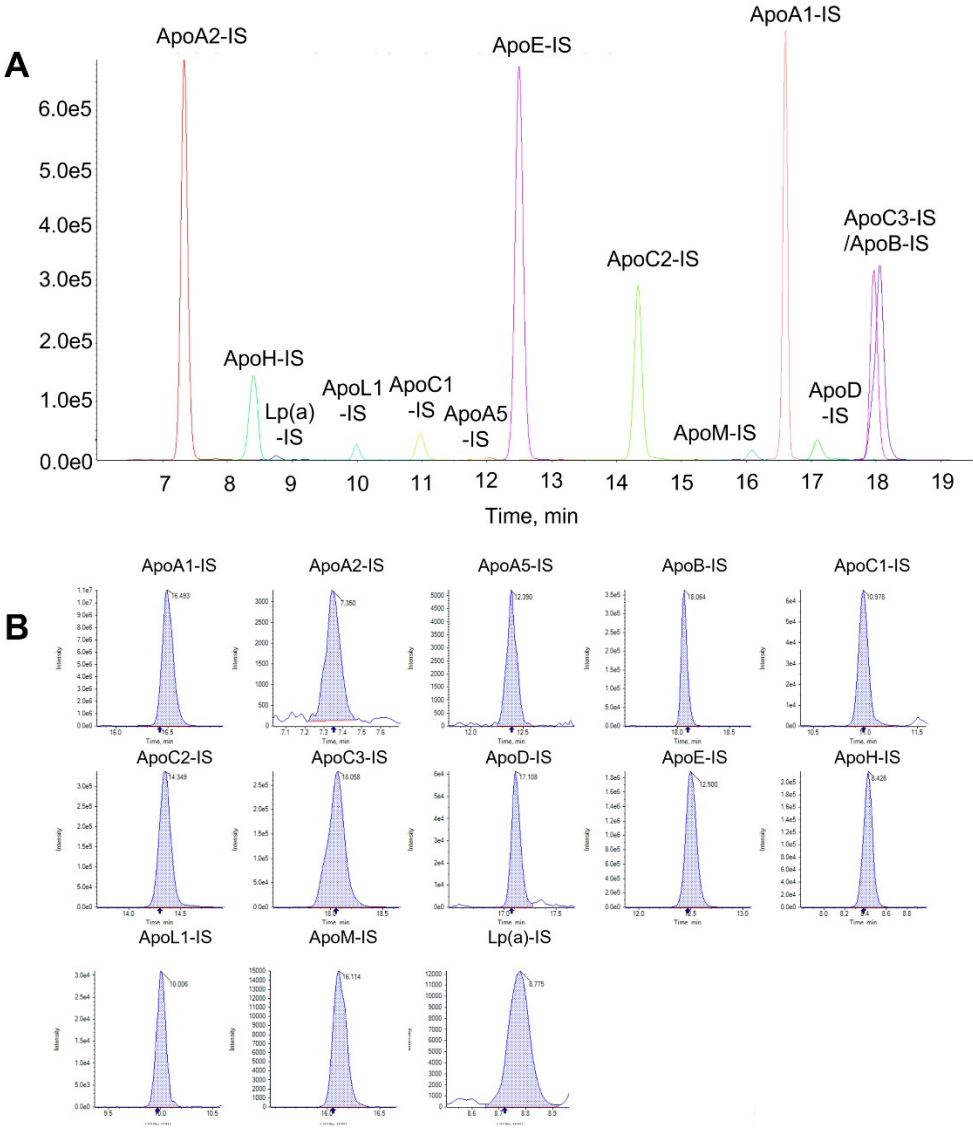

**Supplementary Figure S2.** Effects of solid phase extraction on the dynamic multiple reaction monitoring (MRM) chromatograms containing peptide standards and representative internal standards. (A) human plasma without SPE extraction (B) human plasma with HLB SPE extraction.

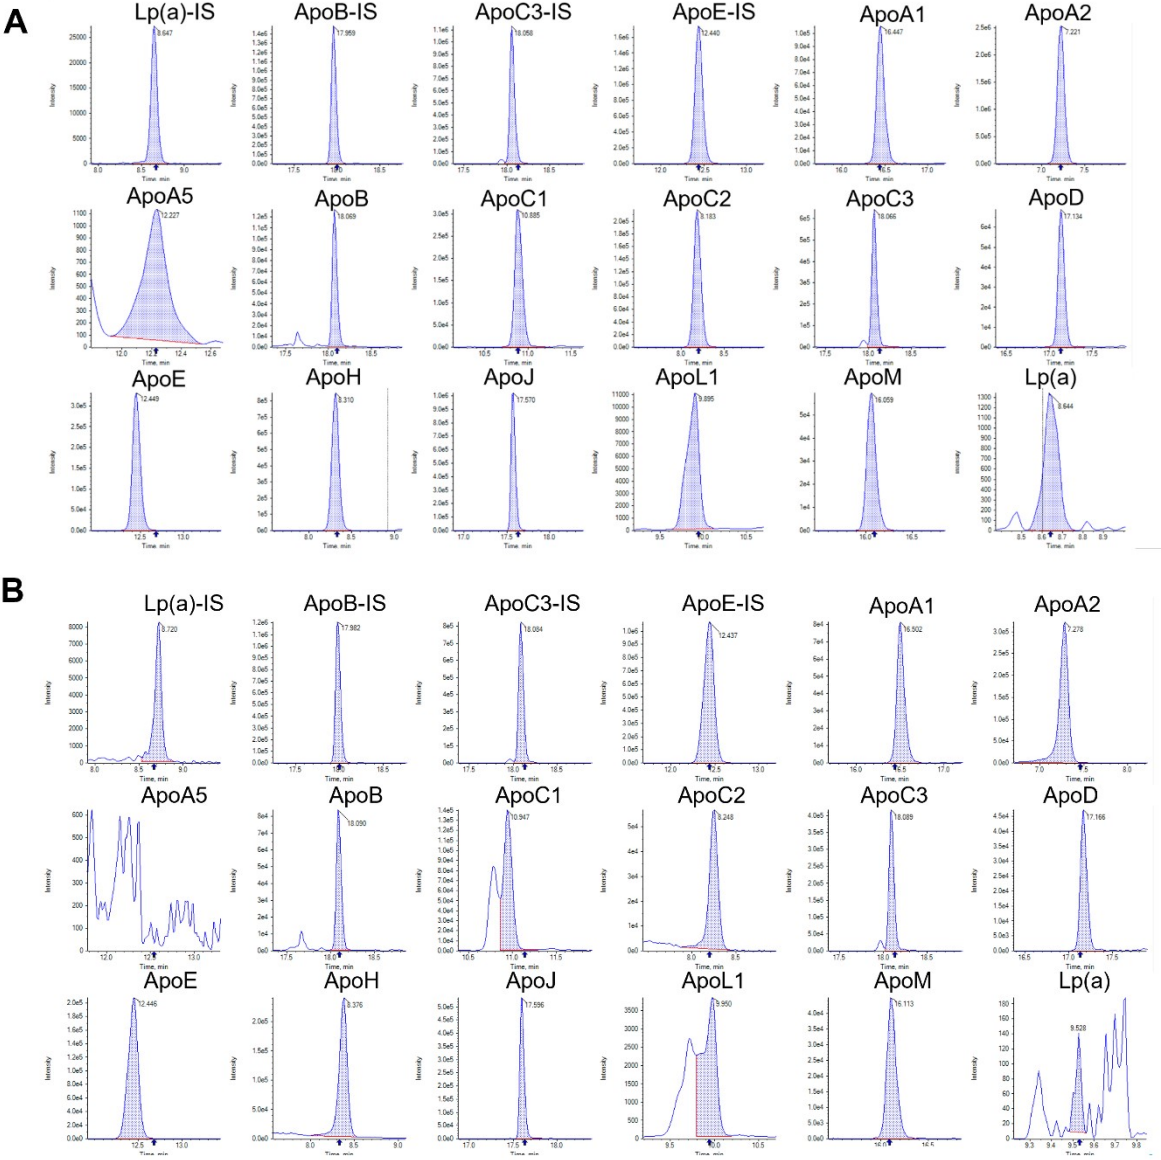

**Supplementary Figure S3.** Effects of different reducing agents on the total ion chromatograms containing mixed peptide standards. (A) Extraction by adding reducing agent DTT. (B) Extraction by adding reducing agent TCEP.

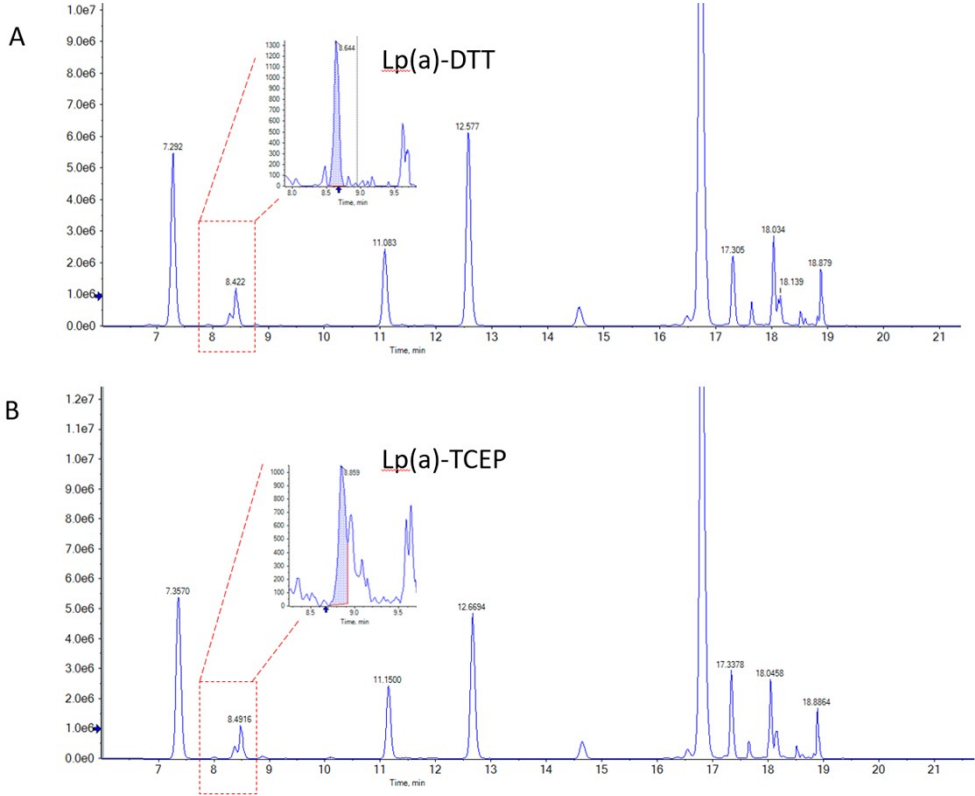

**Supplemental Figure S4.** Effects of different concentration of SDC on sample preparation. (A) 0.5% SDC, (B) 1% SDC, (C) 2% SDC.

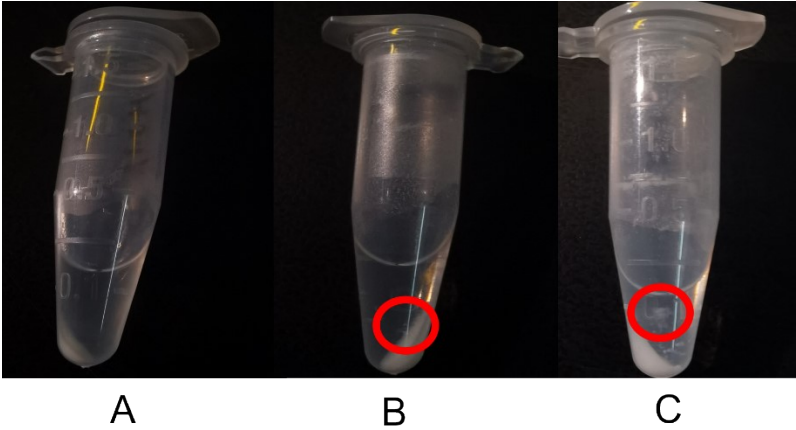

**Supplemental Figure S5.** The dynamic multiple reaction monitoring (MRM) chromatograms of different matrix solutions containing representative internal standards. (A) bovine serum albumin, (B) mice plasma.

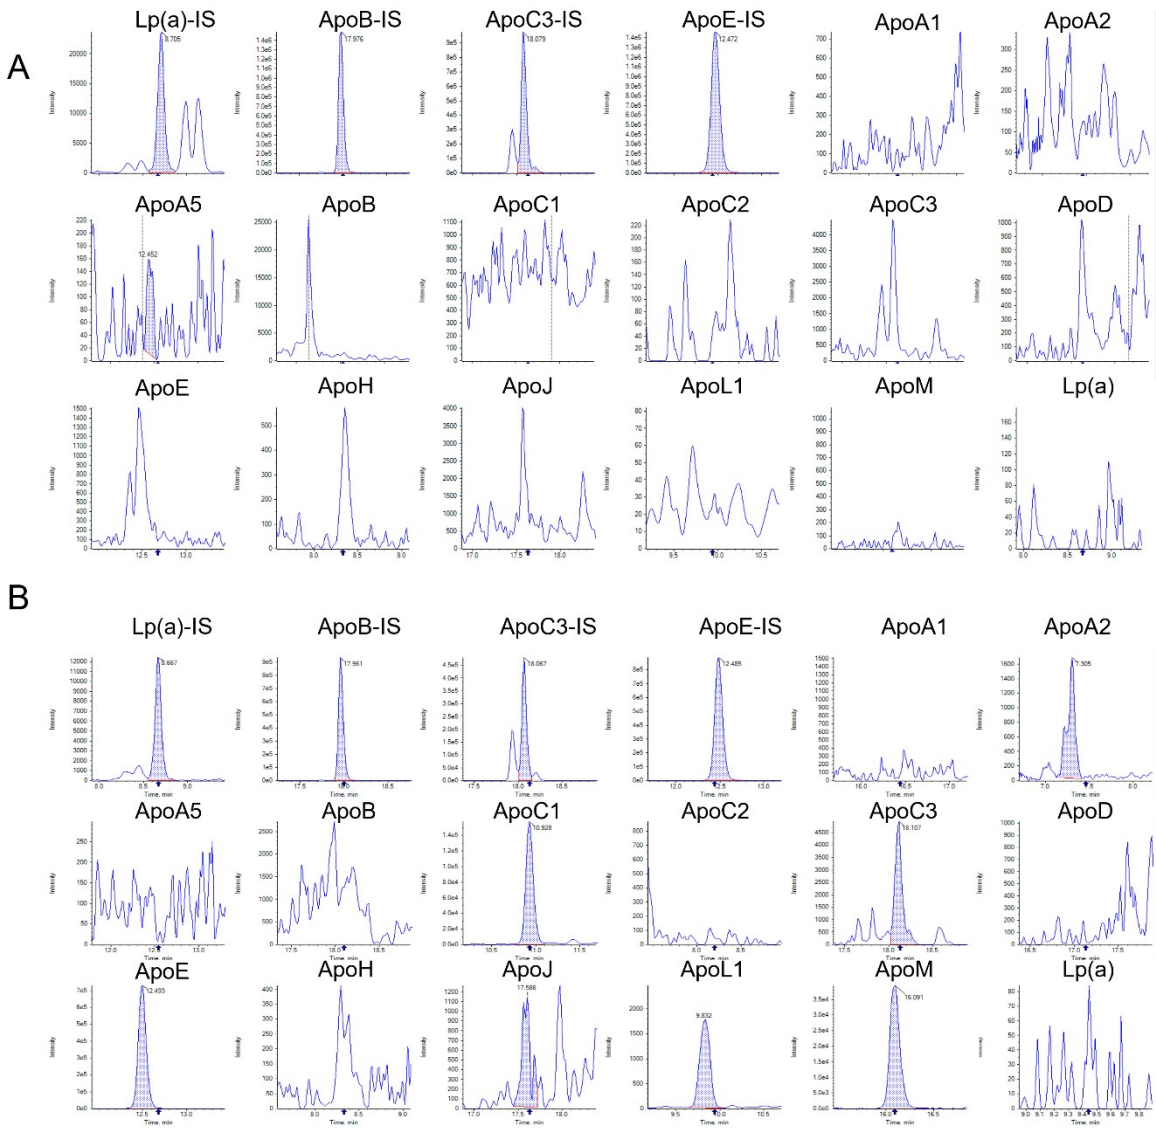

Supplement: d4an00221k1.pdf [file d4an00221k1.pdf]
